# Supplementary material for: Proper migration of lymphatic endothelial cells requires survival and guidance cues from arterial mural cells
Source: eLife. 2022 Mar 22;11:e74094. doi: 10.7554/eLife.74094 (PMC9042226; doi:10.7554/eLife.74094)
Supplement: Figure 1—source data 1. [file elife-74094-fig1-data1.xlsx]

## Sheet: Sheet1
Figure 1 - Source Data 1
Figure 1C:Mural cells presence on aISV
Source Data
Sample
Embryo	aISV	MC presnce (Yes-1; No-0)
2019-08-05_P2	aISV1	1
2019-08-05_P3	aISV1	1
2019-08-07_P2	aISV1	1
2019-08-23_P3	aISV1	1
	aISV2	0
2019-08-23_P4	aISV1	1
	aISV2	1
	aISV3	0
2019-09-23_P1	aISV1	1
	aISV2	1
2019-09-23_P2	aISV1	0
	aISV2	1
	aISV3	1
