# Supplementary material for: Proper migration of lymphatic endothelial cells requires survival and guidance cues from arterial mural cells
Source: eLife. 2022 Mar 22;11:e74094. doi: 10.7554/eLife.74094 (PMC9042226; doi:10.7554/eLife.74094)
Supplement: Figure 1—source data 2. [file elife-74094-fig1-data2.xlsx]

## Sheet: Sheet1
Figure 1 - Source Data 2
Figure 1D: LEC-MC interaction
	Interaction
Embyos	Follow	Not follow
1	1
2	2
3	1
4	1
5	2
6		2
7	3
8	3
9	4	1
10	1
Total	18	3
