# Supplementary material for: Proper migration of lymphatic endothelial cells requires survival and guidance cues from arterial mural cells
Source: eLife. 2022 Mar 22;11:e74094. doi: 10.7554/eLife.74094 (PMC9042226; doi:10.7554/eLife.74094)
Supplement: Figure 1—source data 3. [file elife-74094-fig1-data3.xlsx]

## Sheet: Sheet1
Figure 1 - Source Data 3
Figure 1F: Number of MCs on aISV during LEC migration
Summary Statistics (arithmetic from GraphPad Prism 9)
	Before	After
Total n	14	14
Mean	2.071	2.357
SD	1.141	1.447
SEM	0.305	0.3867
P values*		0.7342		*p values determined using paired student t test
P value summary		ns
Shapiro-Wilk test
W	0.8947	0.9435
P value	0.0944	0.4647
Passed normality test (alpha=0.05)?	Yes	Yes
P value summary	ns	ns
Source Data
Embryo		before	after
1	aISV1	4	5
2	aISV1	3	3
3	aISV1	2	2
	aISV2	0	0
4	aISV1	2	2
	aISV2	3	4
	aISV3	2	2
	aISV4	1	1
5	aISV1	2	3
	aISV2	3	3
6	aISV1	2	2
	aISV2	0	0
	aISV3	2	2
7	aISV1	3	4
