# Supplementary material for: Proper migration of lymphatic endothelial cells requires survival and guidance cues from arterial mural cells
Source: eLife. 2022 Mar 22;11:e74094. doi: 10.7554/eLife.74094 (PMC9042226; doi:10.7554/eLife.74094)
Supplement: Figure 1—source data 4. [file elife-74094-fig1-data4.xlsx]

## Sheet: Sheet1
Figure 1 - Source Data 4
Figure 1G: Duration of migration with or without interaction with MCs
Summary Statistics (arithmetic from GraphPad Prism 9)
	No interaction	Interaction
Total n	3	5
Mean	17.86	9.171
SD	2.749	2.214
SEM	1.587	0.9902
P values*		0.0026
P value summary		**		*p values determined using unpaired student t test
Shapiro-Wilk normality test
W	0.9542	0.8298
P value	0.5882	0.1386
Passed normality test (alpha=0.05)?	Yes	Yes
P value summary	ns	ns
Source Data
	Duration (h)
Sample name	No interaction	interaction
2019-08-23_p3	14.8361
2019-09-23_p2	20.2063
2019-09-23_p2	18.5398
2019-08-05_p3		8.83233
2019-08-23_p4		7.02764
2019-09-23_p2		8.74911
2019-09-23_p2		12.9154
2019-09-23_p1		8.33249
