# Supplementary material for: Proper migration of lymphatic endothelial cells requires survival and guidance cues from arterial mural cells
Source: eLife. 2022 Mar 22;11:e74094. doi: 10.7554/eLife.74094 (PMC9042226; doi:10.7554/eLife.74094)
Supplement: Figure 1—source data 5. [file elife-74094-fig1-data5.xlsx]

## Sheet: Sheet1
Figure 1 - Source Data 5
Figure 1I: Number of rb+ mural cells around ISVs
Summary Statistics (arithmetic from GraphPad Prism 9)
	Siblings	Mutant
Total n	20	10
Mean	11.9	9.171
SD	1.447	1.269
SEM	0.3236	0.9902
P values*		0.0001		*p values determined using Mann Whitney test
P value summary		***
Mann-Whitney U	20.5
Shapiro-Wilk normality test
W	0.8981	0.9032
P value	0.038	0.2375
Passed normality test (alpha=0.05)?	No	Yes
P value summary	*	ns
Source Data
	Number of MCs
	Siblings (embryo n=20)	Mutant (embryo n=10)
	10	9
	13	9
	11	8
	11	11
	15	10
	12	10
	10	9
	11	9
	11	12
	12	8
	13
	11
	13
	15
	11
	12
	13
	12
	10
	12
