# Supplementary material for: Proper migration of lymphatic endothelial cells requires survival and guidance cues from arterial mural cells
Source: eLife. 2022 Mar 22;11:e74094. doi: 10.7554/eLife.74094 (PMC9042226; doi:10.7554/eLife.74094)
Supplement: Figure 1—source data 6. [file elife-74094-fig1-data6.xlsx]

## Sheet: Sheet1
Figure 1 - Source Data 6
Figure 1J:Surface area of lymphatic vessels
Summary Statistics (arithmetic from GraphPad Prism 9)
	Siblings	Mutant )
Total n	20	10
Mean	0.099853	0.82055
SD	0.21577	0.11837
SEM	0.04825	0.03743
P values*		0.0223		*p values determined using unpaired student t test
P value summary		*
Shapiro-Wilk normality test
W	0.9406	0.9598
P value	0.2463	0.7834
Passed normality test (alpha=0.05)?	Yes	Yes
P value summary	ns	ns
Source Data
	Surface area (mm2)
	Siblings (embryo n=20)	Mutant (embryo n=10)
	0.128849	0.670006
	0.697179	0.802225
	0.983841	0.896659
	1.58486	0.925635
	1.05074	0.680995
	0.0939453	1.04699
	0.843532	0.745452
	1.01234	0.734563
	0.987345	0.868452
	1.12543	0.834564
	0.750638
	1.17155
	0.926459
	1.1746
	0.782224
	0.719654
	1.1916
	0.861471
