# Supplementary material for: Proper migration of lymphatic endothelial cells requires survival and guidance cues from arterial mural cells
Source: eLife. 2022 Mar 22;11:e74094. doi: 10.7554/eLife.74094 (PMC9042226; doi:10.7554/eLife.74094)
Supplement: Figure 1—source data 7. [file elife-74094-fig1-data7.xlsx]

## Sheet: Sheet1
Figure 1 - Source Data 7
Figure1—figure supplement 1D: MC relocation during LEC migration
Source Data
Sample		MC number
Embryo	aISV	Mobile	Still
1	aISV1	0	5
2	aISV1	1	2
	aISV2	0	0
3	aISV1	0	2
	aISV2	1	2
	aISV3	0	2
	aISV4	0	1
4	aISV1	1	2
	aISV2	0	3
5	aISV1	0	2
	aISV2	0	0
	aISV3	0	2
6	aISV1	1	3
Total		4	26
Ratio		0.133333	0.866667
