# Supplementary material for: Proper migration of lymphatic endothelial cells requires survival and guidance cues from arterial mural cells
Source: eLife. 2022 Mar 22;11:e74094. doi: 10.7554/eLife.74094 (PMC9042226; doi:10.7554/eLife.74094)
Supplement: Figure 1—source data 8. [file elife-74094-fig1-data8.xlsx]

## Sheet: Sheet1
Figure 1 - Source Data 8
Figure1—figure supplement 2B: Total LEC number in control and AG1296 treated embryos
Summary Statistics (arithmetic from GraphPad Prism 9)
	DMSO	AG1296
Total n	25	19
Mean	4.32	2.842
SD	1.282	1.015
SEM	0.2564	0.2327
P value			0.0002
P value summary			***
Mann-Whitney U			89
				*p values determined using Mann Whitney test
Shapiro-Wilk test
W	0.9273	0.8688
P value	0.0753	0.0138
Passed normality test (alpha=0.05)?	Yes	No
P value summary	ns	*
Source Data
	LEC number
	Embryo	DMSO		Embryo	AG1296
	1	5		1	3
	2	7		2	1
	3	5		3	2
	4	5		4	3
	5	5		5	1
	6	4		6	2
	7	7		7	3
	8	5		8	4
	9	4		9	3
	10	3		10	3
	11	5		11	4
	12	4		12	2
	13	4		13	2
	14	6		14	2
	15	3		15	4
	16	5		16	4
	17	4		17	3
	18	3		18	4
	19	4		19	4
	20	4
	21	2
	22	3
	23	5
	24	2
	25	4
