# Supplementary material for: Proper migration of lymphatic endothelial cells requires survival and guidance cues from arterial mural cells
Source: eLife. 2022 Mar 22;11:e74094. doi: 10.7554/eLife.74094 (PMC9042226; doi:10.7554/eLife.74094)
Supplement: Figure 2—source data 1. [file elife-74094-fig2-data1.xlsx]

## Sheet: Sheet1
Figure 2 - Source Data 1
Figure 2C: TD formation at 120 hpf presented as ratio of total
Source Data
		Numbers of embryos
		experiment 1	experiment 2	experiment 3	Total N	%
NTR(-) MTZ(+)	hardly formed	1	2	5	36	22.2222
	part formed	4	0	3		19.4444
	full formed	10	5	6		58.3333
		Numbers of embryos
		N experiment 1	N experiment 2	N experiment 3	Total N	%
NTR(+) MTZ(+)	hardly formed	9	9	13	34	91.1765
	part formed	0	1	1		5.88235
	full formed	0	0	1		2.94118
	N sum		Ratio %
TD	NTR(-) MTZ(+)	NTR(+) MTZ(+)	NTR(-) MTZ(+)	NTR(+) MTZ(+)
hardly	8	31	22.2222	91.1765
partially	7	2	19.4444	5.88235
fully	21	1	58.3333	2.94118
