# Supplementary material for: Proper migration of lymphatic endothelial cells requires survival and guidance cues from arterial mural cells
Source: eLife. 2022 Mar 22;11:e74094. doi: 10.7554/eLife.74094 (PMC9042226; doi:10.7554/eLife.74094)
Supplement: Figure 2—source data 2. [file elife-74094-fig2-data2.xlsx]

## Sheet: Sheet1
Figure 2 - Source Data 2
Figure 2H: Migration distance in control and ablated LEC
Summary Statistics (arithmetic from GraphPad Prism 9)
	T0-T1		HM
	Control	Ablated	Control	Ablated
Total n	3	5	3	5
Mean	31	7.52	28.57	6.92
SD	6.125	15.06	6.976	13.5
SEM	3.536	6.734	4.028	6.039
P values*		0.0357		0.045		*p values determined using Mann Whitney test or unpaired student t test
P value summary		*		*
Mann-Whitney U	0
Shapiro-Wilk normality test
W	0.9758	0.7265	0.9087	0.8301
P value	0.7017	0.0178	0.4139	0.1393
Passed normality test (alpha=0.05)?	Yes	No	Yes	Yes
P value summary	ns	*	ns	ns
Source Data
	T0-T1 (μm)		HM (μm)
	Control	Ablated	Control	Ablated
2020-03-13	29.9	17.5	34	7.9
2020-03-27	37.6	11.1	31	17.7
2020-04-02	25.5	-18.8	20.7	-15.4
2020-05-14		17.1		17.6
2020-06-04		10.7		6.8
