# Supplementary material for: Proper migration of lymphatic endothelial cells requires survival and guidance cues from arterial mural cells
Source: eLife. 2022 Mar 22;11:e74094. doi: 10.7554/eLife.74094 (PMC9042226; doi:10.7554/eLife.74094)
Supplement: Figure 2—source data 3. [file elife-74094-fig2-data3.xlsx]

## Sheet: Sheet1
Figure 2 - Source Data 3
Figure 2I: Follow-up of DLLV formation at 3dpf
Source Data
	DLLV formation (Yes-1; No-0)
Experiment	Embryo	Control	Ablated
2020-06-05	1	1	1
2020-07-23	2	1	1
2020-07-31	3	1	0
2020-08-06	4	1	0
2020-08-14	5	1	1
