# Supplementary material for: Proper migration of lymphatic endothelial cells requires survival and guidance cues from arterial mural cells
Source: eLife. 2022 Mar 22;11:e74094. doi: 10.7554/eLife.74094 (PMC9042226; doi:10.7554/eLife.74094)
Supplement: Figure 2—source data 4. [file elife-74094-fig2-data4.xlsx]

## Sheet: Sheet1
Figure 2 - Source Data 4
Supplementary Figure 2E-F: Migrating distance post aEC ablation
Source Data
LEC migration distance	embryo n=5
Time (mins post ablation)	Control (μm)		Ablated (μm)
0	0	0	0	0	0	0	0
60	8.3	7.5	4.3	5.1	6.87	3.42	6.03
120	16.5	12.8	5.84	10.2	6.45	6.27	18.6
180	18.5	15.5	11.4	10.4	11.8	10	28.8
240	24.5	20.4	12.7	13.4	16.1	12.8	36.3
aISV migration distance	embryo n=4
Time (mins post ablation)	Ablated (μm)
0	0	0	0	0
60	5.7	11.3	43.4	8.42
120	15.1	25	44.4	19.2
180	22.9	36.8	4.5	27.4
240	28.6	38.5	-4.04	38.2
