# Supplementary material for: Proper migration of lymphatic endothelial cells requires survival and guidance cues from arterial mural cells
Source: eLife. 2022 Mar 22;11:e74094. doi: 10.7554/eLife.74094 (PMC9042226; doi:10.7554/eLife.74094)
Supplement: Figure 3—source data 1. [file elife-74094-fig3-data1.xlsx]

## Sheet: Sheet1
Figure 3 - Source Data 1
Figure 3E: Gene expression analysis on FACS sorted arterial endothelial cells (aECs) and mural cells (MCs)
Summary Statistics (arithmetic from GraphPad Prism 9)
	cxcl12a				cxcl12b				vegfc				ccbe1				dll4
	Negative	aEC	Negative	MC	Negative	aEC	Negative	MC	Negative	aEC	Negative	MC	Negative	aEC	Negative	MC	Negative	aEC	Negative	MC
Total n	6	6	6	6	6	6	6	6	6	6	6	6	6	6	6	6	6	6	6	6
Mean	-0.004583	4.074	-0.01874	2.789	-0.004958	3.9	-0.03734	4.239	-0.04654	7.366	-0.07168	3.57	-0.08622	-3.154	-0.03652	3.651	-0.0129	8.295	-0.05126	0.0168
SD	0.1263	0.6817	0.2576	1.347	0.1313	0.7747	0.3626	0.5359	0.4055	2.403	0.5082	1.056	0.5642	4.657	0.3598	3.349	0.2129	0.3682	0.4299	1.012
SEM	0.05155	0.2783	0.1051	0.5501	0.0536	0.3163	0.148	0.2188	0.1656	0.981	0.2075	0.4311	0.2303	1.901	0.1469	1.367	0.0869	0.1503	0.1755	0.4131
P values*		<0,0001		0.0005		<0,0001		<0,0001		0.0022		<0,0001		0.1402		0.023		<0,0001		0.8825		*p values determined using Mann Whitney test or unpaired student t test
P value summary		****		***		****		****		**		****		ns		*		****		ns
Mann-Whitney U										0
Shapiro-Wilk test	cxcl12a				cxcl12b				vegfc				ccbe1				dll4
	Negative	aEC	Negative	MC	Negative	aEC	Negative	MC	Negative	aEC	Negative	MC	Negative	aEC	Negative	MC	Negative	aEC	Negative	MC
W	0.9722	0.947	0.9475	0.9293	0.996	0.9961	0.9023	0.9202	0.8831	0.7384	0.9489	0.8827	0.9703	0.9196	0.9507	0.9124	0.9759	0.8594	0.9784	0.7982
P value	0.907	0.7158	0.7198	0.5748	0.9987	0.9988	0.3878	0.5069	0.2836	0.0153	0.7312	0.2815	0.8946	0.5021	0.7458	0.4526	0.9292	0.1873	0.9433	0.0566
Passed normality test (alpha=0.05)?	Yes	Yes	Yes	Yes	Yes	Yes	Yes	Yes	Yes	No	Yes	Yes	Yes	Yes	Yes	Yes	Yes	Yes	Yes	Yes
P value summary	ns	ns	ns	ns	ns	ns	ns	ns	ns	*	ns	ns	ns	ns	ns	ns	ns	ns	ns	ns
Source Data
	cxcl12a (normalized log2)				cxcl12b (normalized log2)				vegfc (normalized log2)				ccbe1 (normalized log2)				dll4 (normalized log2)
	Negative	aEC	Negative	MC	Negative	aEC	Negative	MC	Negative	aEC	Negative	MC	Negative	aEC	Negative	MC	Negative	aEC	Negative	MC
	0.1768	4.89347	-0.4463	3.6737	0.087976	4.46131	0.211743	4.84508	0.141469	9.31814	-0.4463	3.6737	-0.45476	-8.31309	-0.24729	7.24437	-0.01255	8.90411	-0.05778	-0.97778
	-0.20153	4.22513	0.340366	4.7587	-0.09369	4.95964	-0.24826	4.61008	-0.15686	8.90314	0.340366	4.7587	0.345244	-3.41309	0.211042	7.28271	0.012446	8.57911	0.055554	-0.66945
	0.037013	4.25201	-0.0831	1.34643	0.028872	3.78721	0.240798	3.49392	0.387298	8.64897	-0.80479	2.24601	-0.9751	-1.4051	-0.56503	0.723301	0.098862	8.05386	-0.72017	0.999834
	-0.03799	4.49035	0.07857	1.26357	-0.02946	2.77554	-0.2892	3.76551	-0.53103	8.76063	0.513545	2.3275	0.576566	4.04823	0.404968	-0.96837	-0.10614	8.18886	0.478167	0.733167
	-0.05173	3.60494	-0.05432	2.86901	-0.19589	4.03411	-0.52124	4.11209	-0.47922	4.08411	-0.23479	4.06187	-0.12048	-8.12715	-0.19307	3.91359	-0.35419	8.08248	-0.33499	1.05168
	0.049938	2.97661	0.052348	2.82401	0.172444	3.38244	0.38209	4.60709	0.359111	4.47911	0.201875	4.35354	0.111188	-1.71381	0.170259	3.71193	0.284146	7.96081	0.271677	-1.03666
