# Supplementary material for: Proper migration of lymphatic endothelial cells requires survival and guidance cues from arterial mural cells
Source: eLife. 2022 Mar 22;11:e74094. doi: 10.7554/eLife.74094 (PMC9042226; doi:10.7554/eLife.74094)
Supplement: Figure 3—source data 2. [file elife-74094-fig3-data2.xlsx]

## Sheet: Sheet1
Figure 3 - Source Data 2
Figure 3G: Colocalization of vegfc and ccbe1 in pdgfrblow and pdgfrbhigh cells
Summary Statistics (arithmetic from GraphPad Prism 9)
	Ratio of vegfc+ rbhigh cells	Ratio of vegfc+ rblow cells	Ratio of ccbe1+ rbhigh cells	ratio of ccbe1+ rblow cells
Total n	25	25	14	14
Mean	4.208	2.539	4.646	1.788
SD	6.423	3.075	5.863	2.529
SEM	1.285	0.615	1.567	0.6758
P values*		0.9445		0.2639	*p values determined using Mann Whitney test
P value summary		ns		ns
Mann-Whitney U		309		76
Shapiro-Wilk normality test
W	0.6987	0.7988	0.7514	0.6756
P value	<0,0001	0.0002	0.0013	0.0002
Passed normality test (alpha=0.05)?	No	No	No	No
P value summary	****	***	**	***
Source Data
vegfc								ccbe1
Embryo	total rbhigh cells	vegfc+ rbhigh cells	Ratio	total rblow cells	vegfc+ rblow cells	Ratio		Embryo	total rbhigh cells	ccbe1+ rbhigh cells	Ratio	total rblow cells	ccbe1+ rblow cells	Ratio
1	12	0	0	25	1	4		1	8	0	0	19	0	0
2	11	0	0	27	0	0		2	9	1	11.1111	18	0	0
3	14	0	0	20	1	5		3	9	0	0	17	1	5.88235
4	12	0	0	22	0	0		4	11	1	9.09091	18	1	5.55556
5	12	0	0	28	0	0		5	9	0	0	24	1	4.16667
6	12	1	8.33333	20	0	0		6	6	1	16.6667	24	0	0
7	13	0	0	22	0	0		7	12	0	0	19	0	0
8	7	0	0	19	0	0		8	11	1	9.09091	23	0	0
9	9	0	0	19	2	10.5263		9	7	0	0	20	0	0
10	8	1	12.5	19	1	5.26316		10	10	1	10	18	0	0
11	10	0	0	23	0	0		11	10	0	0	19	1	5.26316
12	9	0	0	21	1	4.7619		12	11	1	9.09091	24	1	4.16667
13	8	0	0	16	0	0		13	11	0	0	22	0	0
14	10	0	0	23	0	0		14	13	0	0	19	0	0
15	8	1	12.5	22	1	4.54545
16	9	0	0	23	0	0
17	11	0	0	26	2	7.69231
18	9	0	0	22	1	4.54545
19	11	1	9.09091	25	0	0
20	10	1	10	24	0	0
21	9	2	22.2222	25	1	4
22	8	1	12.5	28	2	7.14286
23	7	1	14.2857	22	0	0
24	10	0	0	29	1	3.44828
