# Supplementary material for: Proper migration of lymphatic endothelial cells requires survival and guidance cues from arterial mural cells
Source: eLife. 2022 Mar 22;11:e74094. doi: 10.7554/eLife.74094 (PMC9042226; doi:10.7554/eLife.74094)
Supplement: Figure 3—source data 3. [file elife-74094-fig3-data3.xlsx]

## Sheet: Sheet1
Figure 3 - Source Data 3
Figure3—figure supplement 3B: Gene expression analysis on FACS sorted lymphatic endothelial cells (LECs)
Summary Statistics (arithmetic from GraphPad Prism 9)
	cxcr4a		cxcr4b		ackr3b
	Negative	LEC	Negative	LEC	Negative	LEC
Total n	6	6	6	6	6	6
Mean	0.1798	-1.18	0.04667	-1.91	-1.738	4.209
SD	0.7438	1.166	2.141	2.236	1.577	4.243
SEM	0.3036	0.4762	0.8741	0.9128	0.644	1.732
P values*		0.0368		0.1797		0.0092		*p values determined using Mann Whitney test or unpaired student t test
P value summary		*		ns		**
Mann-Whitney U				9
Shapiro-Wilk test	cxcr4a		cxcr4b		ackr3b
	Negative	LEC	Negative	LEC	Negative	LEC
W	0.8055	0.8853	0.7799	0.9032	0.9107	0.8763
P value	0.0658	0.2943	0.0384	0.3934	0.4408	0.2523
Passed normality test (alpha=0.05)?	Yes	Yes	No	Yes	Yes	Yes
P value summary	ns	ns	*	ns	ns	ns
Source Data
	cxcr4a		cxcr4b		ackr3b
	Negative	LEC	Negative	LEC	Negative	LEC
	1.02407	-0.64148	-2.45963	-2.57519	-0.82759	9.33019
	1.21407	-0.49481	-2.89296	-2.42852	0.285741	9.41352
	-0.20315	-2.47481	2.06648	-2.05185	-1.85148	-0.72648
	-0.17981	-2.74981	1.21648	-5.44019	-0.88148	1.15852
	-0.56481	-0.88981	1.21481	0.569815	-3.64648	3.41852
	-0.21148	0.168519	1.13481	0.468148	-3.50648	2.66018
