# Supplementary material for: Proper migration of lymphatic endothelial cells requires survival and guidance cues from arterial mural cells
Source: eLife. 2022 Mar 22;11:e74094. doi: 10.7554/eLife.74094 (PMC9042226; doi:10.7554/eLife.74094)
Supplement: Figure 3—source data 4. [file elife-74094-fig3-data4.xlsx]

## Sheet: Sheet1
Figure 3 - Source Data 3
Figure3—figure supplement 2B: Colocalization of svep1 in pdgfrb+ cells
Summary Statistics (arithmetic from GraphPad Prism 9)
	pdgfrb+ cells	svep1+ pdgfrb+ cells
Total n	9	9
Mean	5.889	0
SD	2.261	0
SEM	0.7536	0
P values*		<0,0001	*p values determined using unpaired student t test
P value summary		****
Shapiro-Wilk normality test
W	0.9209	Invalid input data
P value	0.3996
Passed normality test (alpha=0.05)?	Yes
P value summary	ns
Source Data
vegfc
Embryo	total pdgfrb+ cells	svep1+ pdgfrb+ cells
1	3	0
2	7	0
3	5	0
4	4	0
5	8	0
6	3	0
7	8	0
8	9	0
9	6	0
