# Supplementary material for: Proper migration of lymphatic endothelial cells requires survival and guidance cues from arterial mural cells
Source: eLife. 2022 Mar 22;11:e74094. doi: 10.7554/eLife.74094 (PMC9042226; doi:10.7554/eLife.74094)
Supplement: Figure 4—source data 1. [file elife-74094-fig4-data1.xlsx]

## Sheet: Sheet1
Figure 4 - Source Data 1
Figure 4C: Migrating distance quantified from 4B
Summary Statistics (arithmetic from GraphPad Prism 9)
	E3				AMD3100
Time (h)	Mean	SD	SEM	N	Mean	SD	SEM	N	P value	P value summary
0	0	0	0	10	0	0	0	25	0.0043	**
0.25	9.64289	3.70235	1.17079	10	5.08673	2.90027	0.580055	25
0.5	13.8463	2.0601	0.651462	10	8.07933	3.99221	0.798441	25		*p values determined using unpaired student t test
0.75	17.5997	4.25867	1.34671	10	10.1174	4.63297	0.926594	25
1	21.5205	6.14906	1.9445	10	12.5321	6.00506	1.20101	25
1.25	22.9155	6.28697	1.98811	10	14.0742	6.85842	1.37168	25
1.5	25.436	7.73388	2.44567	10	16.8314	7.86713	1.57343	25
1.75	23.9015	8.56307	2.70788	10	18.6643	8.17119	1.63424	25
2	26.3105	10.1805	3.21937	10	21.2141	10.7403	2.14806	25
2.25	28.3365	9.0655	2.86676	10	22.1366	9.86775	1.97355	25
2.5	31.446	6.86696	2.28899	9	24.2414	9.78981	1.95796	25
2.75	32.3567	8.65416	3.05971	8	24.6728	10.6181	2.12362	25
3	35.4335	8.40282	2.97084	8	28.1771	11.0944	2.21888	25
3.25	37.2942	7.5175	2.65784	8	30.6417	11.149	2.22979	25
3.5	40.3853	8.17309	2.88962	8	32.5819	12.1574	2.43147	25
3.75	41.5765	8.19117	2.89602	8	34.6834	14.8337	2.96674	25
4	43.8623	9.40557	3.32537	8	35.3194	13.8806	2.77612	25
4.25	48.1091	11.4031	4.0316	8	35.84	13.8302	2.88379	23
4.5	48.5682	15.3008	5.40966	8	39.3428	14.637	3.12063	22
4.75	51.8805	19.4079	6.86174	8	41.5223	16.8063	3.58311	22
5	55.5484	20.9414	7.40391	8	42.3308	19.0917	4.16615	21
5.25	58.3055	23.2703	8.22728	8	45.5905	19.0602	4.15927	21
5.5	59.1215	22.7582	8.04623	8	47.3293	20.3367	4.43784	21
5.75	61.3123	23.4476	8.28997	8	48.1421	20.8963	4.55995	21
6	62.6377	25.8323	9.13311	8	49.0131	20.6966	4.51636	21
6.25	70.0495	26.4179	9.98502	7	49.1364	20.2979	4.53876	20
6.5	73.5532	28.8014	11.7581	6	51.8774	20.0479	4.5993	19
6.75	72.5179	29.1418	11.8971	6	51.2365	19.1475	4.51311	18
7	75.8354	31.8188	12.99	6	52.833	19.9858	4.7107	18
7.25	79.7543	31.6569	12.9239	6	52.4821	21.6271	5.24534	17
7.5	80.2119	33.3061	13.5972	6	53.1478	22.1686	5.37667	17
7.75	72.7817	32.4737	14.5227	5	53.9632	21.1383	5.12679	17
8	69.7678	33.1428	14.8219	5	51.9952	19.2017	4.95785	15
8.25	70.1779	35.795	16.008	5	56.2602	19.3649	4.99999	15
8.5	70.7605	32.9799	14.7491	5	56.1059	22.4534	5.79744	15
8.75	69.7656	34.2624	15.3226	5	55.96	24.3439	6.28557	15
9	70.0002	33.2634	14.8759	5	57.7321	23.3131	6.01941	15
9.25	71.545	33.285	14.8855	5	58.1016	23.6253	6.55249	13
9.5	78.2701	32.764	16.382	4	59.7362	25.287	7.29973	12
9.75	80.0797	34.1451	17.0725	4	58.3844	27.1697	9.60595	8
10	81.6238	35.6612	17.8306	4	61.236	28.3614	10.0273	8
10.25	69.9209	35.0941	20.2616	3	56.2055	26.3987	9.97779	7
10.5	73.3736	33.6998	19.4566	3	55.832	25.4244	9.60952	7
10.75	82.1997	41.1018	29.0633	2	59.1897	28.8481	11.7772	6
Source Data
Time (h)	E3 (n embryo = 6)											AMD3100 (n embryo = 10)
0	0	0	0	0	0	0	0	0	0	0		0	0	0	0	0	0	0	0	0	0	0	0	0	0	0	0	0	0	0	0	0	0	0	0	0
0.25	1.59817	7.19261	8.02668	11.1773	13.3444	7.99325	10.8229	14.59	11.9632	9.72037		4.02881	4.69547	11.2994	2.83225	2.32906	3.75449	4.51454	2.31096	3.56514	2.6049	6.18572	4.32948	5.77947	2.25851	7.46376	5.29516	1.74757	4.1836	10.2743	2.97909	5.1937	6.54705	4.36775	5.22948	13.3985
0.5	12.776	14.7237	13.1131	11.408	14.0332	10.2373	16.1716	17.1006	14.3711	14.5284		5.79329	6.38009	11.8621	5.52601	8.34525	6.89359	11.6795	3.4831	14.0039	3.12356	6.92183	15.6363	8.09489	2.77288	10.4357	5.47122	6.24996	9.24973	10.7862	3.24731	7.24766	17.7511	4.68356	5.15541	11.1892
0.75	15.2985	14.9235	15.359	13.5731	25.0401	13.7501	17.2163	25.2666	17.3612	18.2083		2.04847	11.036	15.105	6.64696	8.53008	7.86637	11.0353	5.25055	16.7896	7.11552	12.8903	18.8312	8.13307	2.98922	12.2232	4.39504	8.84395	11.3769	12.29	4.45821	8.45829	16.6063	8.52051	15.3413	16.1531
1	18.1702	15.7131	19.4002	16.3709	31.199	13.9455	22.0205	30.8833	26.5275	20.9747		8.86621	16.4007	17.7148	5.60999	9.46217	10.8582	11.8326	6.12131	17.3315	22.6759	14.5519	22.2182	10.8327	3.01647	14.1065	5.74534	4.8446	8.07878	13.7166	6.72953	15.0425	20.6919	7.5259	15.8561	23.471
1.25	22.7023	17.4206	23.3561	19.4636	33.0857	15.4498	24.7367	32.5674	24.8148	15.5581		5.49701	24.793	22.1413	7.31274	10.8405	11.1189	13.6477	15.3236	8.9014	25.2361	18.3855	22.6821	11.6328	5.31898	15.9373	8.65259	5.55496	9.77768	16.186	8.79483	12.3801	24.208	9.44557	10.3978	27.6881
1.5	26.2161	27.1245	26.9055	22.3912	37.1951	18.4074	28.0329	36.9385	16.6209	14.5277		9.64548	31.7823	22.3587	11.3031	7.61784	15.1037	13.966	20.6494	8.57258	24.4823	23.1945	20.5545	12.0972	10.7739	20.0685	7.64587	8.34966	14.6058	16.7702	4.80235	15.244	27.0095	30.1933	13.5177	30.4761
1.75	28.3633	25.3664	26.3585	23.1368	33.9309	19.199	28.105	34.2323	11.9744	8.34813		10.153	32.3116	25.8014	8.25048	11.1612	19.5782	16.2997	15.6789	7.55407	23.9976	25.508	24.9524	12.915	12.2156	21.8697	10.7629	13.2476	14.3919	15.9945	20.1471	13.5078	23.787	35.0431	14.5808	36.897
2	26.8006	27.7416	35.1244	23.5224	37.2035	17.7445	31.0845	40.4175	9.97304	13.4926		10.0023	36.8464	26.3134	7.76477	8.2188	20.8594	14.9104	22.0936	9.23744	37.5339	36.9886	26.7787	15.6773	11.4918	22.7472	9.14763	7.46286	20.8092	18.3561	26.4462	15.0398	30.7083	41.6231	16.8832	36.4115
2.25	29.9268	27.8958	30.5447	24.4065	39.4672	20.1445	35.2736	42.2896	14.2222	19.1944		11.2652	38.4636	28.6145	8.9034	8.09705	23.4666	13.3798	19.1585	10.7844	24.436	37.8329	27.8111	16.9282	12.9929	24.343	13.4227	15.8587	18.2207	20.5016	31.0279	21.6783	28.4068	39.7058	17.5262	40.5884
2.5	33.1064		37.1236	25.7685	37.4257	27.5736	37.3676	39.4243	24.1061	21.1179		12.7287	40.2669	30.1097	11.3519	8.62792	25.6399	17.0193	24.9684	15.348	26.2894	38.3684	25.6683	16.9173	24.0514	25.5273	18.0748	18.6208	20.3648	13.7732	34.4392	22.4851	37.6432	38.7136	16.7609	42.2764
2.75			36.309	26.0666	41.675	33.1576	35.5358	42.423	26.7978	16.8885		11.6035	38.3986	33.1137	13.4396	8.05383	25.3239	13.4009	24.4305	17.6638	31.9277	36.0134	22.7254	17.9244	19.8359	25.6428	19.0554	14.7629	19.929	16.6364	33.1663	23.3212	39.986	44.8821	19.0817	46.5009
3			41.1506	28.048	46.0119	37.0625	38.0842	43.1687	26.7978	23.1441		23.0602	40.9634	36.7902	17.0108	12.1364	30.7903	22.9793	26.0943	24.4928	39.8988	42.356	27.1354	17.8155	21.1334	26.3384	12.0636	19.4688	25.8185	18.7779	40.7529	22.7166	36.1909	56.5471	20.4254	42.6701
3.25			44.8323	28.552	45.1988	37.3116	42.263	42.687	29.0922	28.4165		21.3375	44.3421	45.8756	21.6732	10.3166	32.5864	30.831	33.8189	28.3518	41.733	46.787	28.8416	18.3989	23.0377	28.5245	21.3542	25.278	22.9401	22.4253	40.5725	29.0749	31.1709	58.5626	18.2064	40.0018
3.5			47.7411	32.0625	48.31	40.1646	48.8682	44.6961	30.8424	30.3973		23.8216	44.827	48.8782	23.5942	9.13111	36.9273	34.9039	27.4691	28.5103	44.7537	50.3596	26.4828	22.7927	24.4048	31.8899	18.3555	30.1102	25.0449	26.5342	45.9149	28.1945	36.5539	62.1248	19.1788	43.789
3.75			46.026	35.3627	47.5848	42.0674	55.0495	42.939	31.6667	31.9155		25.5989	47.6424	53.9385	24.514	9.11313	34.5025	33.7056	28.1593	33.2341	47.7761	52.7227	24.7252	18.5897	27.9033	32.7395	12.0558	43.2594	29.451	26.8155	53.9848	29.3724	36.2727	73.85	20.5895	46.5685
4			49.0156	38.9896	41.5919	44.6467	61.5189	48.7438	33.3718	33.0203		22.2158	48.821	49.1969	25.9227	12.9498	26.9303	36.97	24.8696	34.5739	47.1775	55.6313	23.7633	23.7177	31.865	33.5334	20.1651	40.5223	27.9714	28.6687	57.4637	33.8835	36.6864	70.6097	20.7762	48.1004
4.25			57.5884	42.9776	46.5725	45.9252	70.2824	48.9278	33.5039	39.0949		21.0463	45.0692	49.1633	27.3873	12.0167	26.2044	43.7689	23.7619	35.3044	54.9784			18.8319	32.8881	35.6592	24.8778	47.2111	27.0126	30.9896	53.6298	33.3449	40.7826	69.4425	23.3532	47.5955
4.5			69.5968	45.8201	41.0466	47.5362	72.1417	49.1648	32.2696	30.9698		27.6414	44.6762	48.7659	27.4974		24.6433	39.2003	26.862	36.4596	59.2265			19.7603	33.1898	41.6553	23.7387	63.5403	30.3812	33.2426	62.4928	34.9129	44.3851	70.6611	22.6008	50.009
4.75			81.8181	43.9946	41.8945	48.7572	80.8841	52.0304	31.8639	33.8013		26.7521	45.0826	53.3291	29.5446		26.7957	33.1421	28.0024	37.0693	75.2751			27.0008	35.4382	41.9963	25.5415	59.2014	33.3577	31.045	69.7174	37.239	49.1486	79.2279	20.4301	49.1535
5			84.6912	47.6957	39.9476	48.4831	87.4401	64.2999	35.243	36.5866		25.8275	50.36	58.5706	31.078		30.9897	31.6647	28.3908	37.2956	76.0487			29.4074	38.2764	49.6075	12.3921	68.666	37.6094	21.9118		43.5345	50.2057	90.3922	26.2485	50.469
5.25			86.2004	47.5149	40.5065	47.6375	93.5253	76.6128	36.5761	37.8702		24.2022	55.1241	63.0229	31.4682		36.1029	48.4631	28.8485	39.3502	80.0843			30.7559	40.0607	51.415	21.833	69.3595	45.9991	22.9445		45.5471	52.9604	92.3446	25.6007	51.9142
5.5			84.9807	49.5607	38.6623	47.1502	94.2285	77.9681	39.6574	40.764		23.1858	53.7018	66.6701	33.4212		28.671	53.549	28.2835	40.7813	86.7827			33.1947	40.0951	54.0383	20.8873	68.3185	63.2349	32.3063		46.4977	50.4136	93.9695	22.8752	53.0374
5.75			88.0099	49.9022	41.7828	50.9187	97.1303	80.9721	38.3751	43.4074		23.2751	53.3334	68.038	34.1551		31.6151	57.7303	25.8548	40.1257	83.1959			31.2096	37.6482	56.0166	20.9775	68.0283	60.9305	31.6838		52.3497	57.0557	98.252	22.932	56.5766
6			89.8857	60.9501	36.1656	50.1726	97.6362	88.7913	35.6206	41.8799		24.8696	55.8683	65.6586	35.7261		35.1314	53.7616	29.4355	34.4388	86.9225			31.8044	39.6294	54.7051	21.216	66.2133	69.8563	32.3341		51.8535	53.1693	97.0851	26.5516	63.0438
6.25			92.4925	67.6892		50.7444	97.2634	99.5599	36.7837	45.8131		32.6882	55.4481	62.6608	37.453		35.8161	59.3947	31.6963	31.3984				30.2049	36.8091	51.3962	30.9144	74.071	74.2969	31.3872		57.9018	45.4338	99.071	27.0948	77.5918
6.5			97.6749			53.6963	99.1936	101.353	38.5263	50.8748		31.9937	57.7737	62.0253	38.9311			65.0405	39.3088	28.5689				37.8902	39.4008	54.5083	30.6573	74.8195	82.0352	26.123		58.5263	59.2876	93.5228	31.216	74.0424
6.75			95.6132			50.6773	97.94	102.953	39.9395	47.9847		33.3249	55.7625	57.1236	40.4125			67.2323	42.1412	30.3448				40.495	37.6797	53.1429	28.6329	75.0328	78.683	29.5099		57.5403	72.3894		32.5497	90.2589
7			107.876			49.4773	98.2487	107.784	43.0647	48.562		34.1155	49.8695	55.2289	39.6346			69.2512	48.4996	35.8939				36.9888	35.1098	59.5504	31.6459	70.4761	80.5213	36.2052		57.1254	91.3039		30.914	88.6601
7.25			115.314			54.9785	99.2796	109.593	44.5813	54.7794		33.8151	58.2155	49.8427	39.2718			72.2837	49.1962	37.3123				37.8613	38.1263	63.9234	24.0841	69.7191		37.5419		54.9002	87.7227		33.1044	105.275
7.5			119.218			55.9913	100.459	110.278	45.9987	49.3264		36.0028	57.8194	43.1039	39.5819			73.4165	52.6161	39.6381				39.631	37.2202	66.3325	24.5341	71.9083		40.7178		55.4429	88.7017		29.7102	107.136
7.75						56.9676	102.711	112.832	46.5115	44.8862		31.7612	50.5222	50.9849	44.2779			76.5529	52.2955	43.2024				43.1622	36.1445	65.6765	28.246	69.7354		39.4066		61.8433	90.7555		31.0889	101.718
8						50.1138	101.622	109.995	43.2036	43.9044		30.3503	51.4341	49.8477	44.3683			73.2821	57.3972	40.6561				42.8638		69.86	20.5093	71.0683		40.4985		67.1949	89.9683		30.6285
8.25						49.5765	104.464	113.557	38.8796	44.4126		32.7555	57.0173	50.7562	47.6853			77.1299	61.2495	45.5845				49.2066		73.7507	30.2863	82.0872		40.8698		66.0204	95.1248		34.3793
8.5						52.1495	105.068	108.245	42.152	46.1882		33.4715	62.7821	31.5053	51.2685			84.1331	62.6954	42.1853				48.7154		78.7855	22.6721	79.3434		36.8897		74.0704	95.8068		37.2634
8.75						47.2873	108.327	106.157	44.5936	42.463		30.6878	62.6507	20.319	51.2352			89.8158	65.1048	40.7038				50.5933		83.2371	22.5098	81.666		43.2974		65.9613	96.2325		35.3854
9						48.8093	103.843	108.684	47.2752	41.3895		30.9483	62.3002	36.3838	54.1162			91.3237	64.4484	42.546				51.6494		84.2003	23.6152	82.968		43.2974		66.6098	97.7445		33.8308
9.25						47.9908	105.733	110.117	49.1263	44.7577		31.3986			53.798			90.7189	56.1856	40.573				56.3842		85.0038	24.0861	78.9675		43.0534		63.8056	96.485		34.8612
9.5						48.9545	105.77	107.49	50.8659			40.0145			55.2087			92.3232	53.723	39.5455						85.7581	23.68	84.8818		43.7076		61.6484	100.623		35.72
9.75						47.4417	109.146	109.983	53.748						59.6848			95.1124		39.9414							25.9787			44.9565		64.7352	100.018		36.6484
10						47.0945	114.242	110.482	54.6766						68.7902			95.1883		45.4063							29.0138			46.1819		71.861	103.684		29.7628
10.25						50.0195		110.442	49.3012						71.298					45.8697							30.9832			48.0193		64.2088	104.387		28.6726
10.5						52.5116		112.252	55.3571						73.0674					47.0018							32.0199			46.3315		64.4751	100.29		27.6385
10.75						53.1363		111.263							76.9013												26.8435			47.9251		69.4181	102.002		32.048
