# Supplementary material for: Proper migration of lymphatic endothelial cells requires survival and guidance cues from arterial mural cells
Source: eLife. 2022 Mar 22;11:e74094. doi: 10.7554/eLife.74094 (PMC9042226; doi:10.7554/eLife.74094)
Supplement: Figure 4—source data 2. [file elife-74094-fig4-data2.xlsx]

## Sheet: Sheet1
Figure 4 - Source Data 2
Figure 4D: Migrating velocity quantified from 4B
Summary Statistics (arithmetic from GraphPad Prism 9)
	E3	AMD3100
Total n	8	10
Mean	4.612	3.37
SD	2.122	0.9859
SEM	0.7502	0.3118
P values*		0.1182		*p values determined using unpaired student t test
P value summary		ns
Shapiro-Wilk test
W	0.937	0.9218
P value	0.5815	0.3721
Passed normality test (alpha=0.05)?	Yes	Yes
P value summary	ns	ns
Source Data
	Velocity of migrtaion (µm/h)
LEC	E3 (n embryo = 6)	AMD3100 (n embryo = 10)
1	5.88178	2.65375
2	4.13895	3.9049
3	3.23866	2.37276
4	8.2607	5.32183
5	6.6662	3.41769
6	3.82754	2.99919
7	2.77408	4.01782
8	2.10791	4.19699
9		2.54426
10		2.26598
