# Supplementary material for: Proper migration of lymphatic endothelial cells requires survival and guidance cues from arterial mural cells
Source: eLife. 2022 Mar 22;11:e74094. doi: 10.7554/eLife.74094 (PMC9042226; doi:10.7554/eLife.74094)
Supplement: Figure 4—source data 3. [file elife-74094-fig4-data3.xlsx]

## Sheet: Sheet1
Figure 4 - Source Data 3
Figure 4F: Filopodia formation quantified from 4E
Summary Statistics (arithmetic from GraphPad Prism 9)
	E3			AMD3100					P values*	P value summary
Time (h)	2.5	5	7.5	2.5	5	7.5		E32.5h vs. AMD31002.5h	0.2642	ns
Total n	8	8	8	12	12	12		E35h vs. AMD31005h	0.1348	ns
Mean	0.1051	0.1044	0.04545	0.1493	0.1611	0.1886		E37.5h vs. AMD31007.5h	0.0004	***
SD	0.1222	0.09388	0.04387	0.04499	0.06839	0.08659
SEM	0.04319	0.03319	0.01551	0.01299	0.01974	0.025
Shapiro-Wilk test
	E3			AMD3100				*p values determined using unpaired student t test or Mann Whitney test
	2.5	5	7.5	2.5	5	7.5
W	0.7904	0.927	0.8918	0.9285	0.9307	0.9139
P value	0.0226	0.4893	0.2432	0.3645	0.3881	0.2391
Passed normality test (alpha=0.05)?	No	Yes	Yes	Yes	Yes	Yes
P value summary	*	ns	ns	ns	ns	ns
Source Data
	E3 (n embryo=8)				AMD3100 (n embryo=10)
LEC	2.5 h	5 h	7.5 h	LEC	2.5 h	5 h	7.5 h
1	0.0943396	0.015748	0	1	0.234375	0.25974	0.186335
2	0.13624	0.0867679	0.0478469	2	0.109689	0.095057	0.13986
3	0.0582751	0.0609013	0.0689655	3	0.170778	0.192308	0.141093
4	0.0521512	0.0565771	0	4	0.134639	0.0686275	0.134855
5	0	0.153846	0.0498753	5	0.122888	0.117647	0.209205
6	0.380952	0.275862	0.0752823	6	0.0841515	0.185529	0.236967
7	0.119048	0.185676	0.121654	7	0.118443	0.114193	0.155763
8	0	0	0	8	0.161725	0.126582	0.110701
				9	0.144578	0.105769	0.07431
				10	0.119617	0.233645	0.187793
				11	0.166667	0.277778	0.389016
				12	0.223642	0.15625	0.29724
