# Supplementary material for: Proper migration of lymphatic endothelial cells requires survival and guidance cues from arterial mural cells
Source: eLife. 2022 Mar 22;11:e74094. doi: 10.7554/eLife.74094 (PMC9042226; doi:10.7554/eLife.74094)
Supplement: Figure 4—source data 4. [file elife-74094-fig4-data4.xlsx]

## Sheet: Sheet1
Figure 4 - Source Data 4
Figure 4I: Migrating distance quantified from 4H
Summary Statistics (arithmetic from GraphPad Prism 9)
	DMSO				SL327
time (h)	Mean	SD	SEM	N	Mean	SD	SEM	N		P value	P value summary
0	0	0	0	12	0	0	0	11		<0,0001	****
0.4	8.20833	9.02315	2.60476	12	1.49618	2.17949	0.65714	11
0.8	15.3667	17.2559	4.98135	12	2.99934	4.70799	1.41951	11		*p values determined using unpaired student t test
1.2	17.1083	16.9507	4.89325	12	6.44608	9.77807	2.9482	11
1.6	20.0667	17.6384	5.09175	12	6.278	10.4574	3.15304	11
2	22.7167	17.9486	5.1813	12	3.66042	11.9395	3.7756	10
2.4	25.3583	17.7655	5.12845	12	4.54318	11.8027	3.73233	10
2.8	26.5167	19.2791	5.56541	12	4.485	11.8898	3.75988	10
3.2	27.7417	19.8538	5.7313	12	3.9824	12.6879	4.01226	10
3.6	27.6417	21.7722	6.2851	12	0.242854	9.89643	3.29881	9
4	27.7167	23.1551	6.68431	12	-0.564061	10.775	3.59167	9
4.4	27.3917	23.8194	6.87606	12	-0.886283	10.9632	3.65439	9
4.8	29.1083	25.4373	7.34312	12	-2.13073	11.7988	3.93294	9
5.2	29.5667	26.7113	7.7109	12	-3.34184	13.1364	4.3788	9
5.6	30.2083	27.723	8.00293	12	-6.07517	14.504	4.83468	9
6	31.6917	27.6989	7.99599	12	-5.48571	16.2145	6.12852	7
6.4	32.2	29.4583	8.50387	12	-6.17143	16.6047	6.27598	7
6.8	32.2833	30.0531	8.67559	12	-7.37143	16.5593	6.25881	7
7.2	33.9	32.0509	9.25231	12	-7.22857	16.7262	6.32191	7
7.6	35.175	32.4173	9.35806	12	-5.42857	17.0378	6.43967	7
8	35.9417	31.8853	9.2045	12	-7.25714	18.1796	6.87126	7
8.4	33.8545	30.3599	9.15384	11	-11.0857	18.0192	6.81062	7
8.8	34.5091	29.9016	9.01567	11	-11.7714	19.07	7.20779	7
9.2	40.175	32.5244	9.38899	12	-12.6714	20.1024	7.59799	7
9.6	36.9333	35.7047	11.9016	9	-11.7167	21.7224	8.86812	6
10	32.3625	32.8655	11.6197	8	-17.12	21.5932	9.65678	5
10.4	38.2125	30.0168	10.6125	8	-17.96	21.5357	9.63107	5
10.9	57.38	23.053	10.3096	5	-18.72	22.47	10.0489	5
11.3	64.125	22.6292	11.3146	4	-18.64	21.599	9.65938	5
11.7	64.75	21.7259	10.863	4	-18.9	22.0344	9.85409	5
12.1	66.175	19.1594	9.5797	4	-20.46	22.436	10.0337	5
12.5	71.2333	17.8511	10.3064	3	-13.58	24.489	10.9518	5
12.9	71.0667	16.3464	9.43757	3	-12.28	24.433	10.9268	5
13.3	70.7333	16.4634	9.50514	3	-17.46	23.6169	10.5618	5
13.7	66.35	19.5869	13.85	2	-12.68	21.9593	9.82051	5
Source Data
	DMSO (embryo n=10)												SL327 (embryo n=9)
time (h)	0	0	0	0	0	0	0	0	0	0	0	0	0	0	0	0	0	0	0	0	0	0	0
0	1.1	24.5	0.8	16.6	16.6	0.8	3.6	8.4	2.1	21.4	0.6	2	0.1	5.6	1.6	0.2	-0.6	-2.4	2.5	1.9	3.9	2.2	1.45801
0.4	7.4	62.2	-0.7	18.7	18.7	7.1	14.2	18.8	2	29.2	3	3.8	0.1	12	0.7	-0.5	-1.5	-2	4.1	0.7	10.6	5.2	3.59269
0.8	12.9	59.3	-5.9	13.6	27.7	15.2	14.9	21.5	4.2	31.9	3.9	6.1	0.2	14.7	0.5	0.8	-1.6	31	3.1	-0.8	13.2	4.8	5.00689
1.2	16.6	67	8.4	10.1	28.2	23	14.7	19.2	1.9	35.6	6.1	10	2.5	17.8	0.4	-3.4	-0.5	30.8	5.4	-1.8	14.3	2.1	1.45801
1.6	13	68.1	30.4	8.2	26.5	27.4	11.2	21.5	-0.2	38.9	12.5	15.1	2	20.7	-1.2	-5	-8	29.7	2.3	-2.3		-0.6	-0.99584
2	18.2	70.2	34.3	9.2	28.7	24.7	10	23	0.3	38.5	25.7	21.5	0.3	20.2	-1.6	-8.3	-1.3	29.9	7.3	-3.7		4	-1.36824
2.4	23.4	75.3	34.9	9.5	28.8	19	8.1	23.2	0.3	41.3	30.4	24	-1	20.2	-1.65	-9	-1.2	30	8	-2		3	-1.5
2.8	28.3	78.1	35	14	32.3	12.8	4	20.9	6.6	43.5	30.5	26.9	-4	20.2	-1.7	-12.8	-1.1	30.4	8.9	-1.2		2.8	-1.67601
3.2	35	78.8	35.5	12.4	32.9	6.5	-2.3	17.5	7.4	45.4	34.7	27.9	-5.4	21.3	-3.8	-14.9	-1.5		7.5	0.5		0.8	-2.31431
3.6	36.3	78	37.9	15.3	34.8	2	-6.5	16.5	4.7	46.9	39.2	27.5	-5.1	21	-3.9	-18.2	-1.4		9.4	-4.6		0.3	-2.57655
4	32.8	78.5	38	20.5	38.1	0.2	-6.7	15.1	2.3	47.6	41.3	21	-6	21	-4	-19	-1.4		9	-5		0
4.4	48.9	79.1	38	26.4	40	-3	-8.2	15.3	1.8	48.6	42.9	19.5	-6.8	21	-5.9	-21.8	-1.5		8.9	-7.9		-2.6
4.8	48.8	78.7	45.1	25.7	41.6	-2.2	-7.2	11.7	-1.6	52.9	45.9	15.4	-5.9	21.1	-9.7	-26.2	-2		7.8	-12.2		-0.4
5.2	48.4	78.1	51.7	26.8	43.5	0.8	-6.2	3.7	-3	56.7	46.5	15.5	-7.4	20.9	-12	-30.6	-1.9		6.7	-13		-14.8
5.6	48.3	76.1	52.9	29.6	48.5	0.4	-7.6	10.3	-0.8	61.9	46.2	14.5	-5.3	20.9	-12.6	-30.7	-2.6		5.5	-13.6
6	48.8	76.4	53.3	29.1	53.7	-4.2	-9.1	11.5	-2.1	67.3	47.1	14.6	-5.5	19.8	-14.9	-31.1	-3.1		7.3	-15.7
6.4	48.7	76.5	54.6	27.5	51.5	-4.9	-8.8	12.8	-2.8	72.1	46.6	13.6	-5.7	20.5	-15.5	-31.5	-8.9		4.9	-15.4
6.8	47.8	76.7	55.7	23.8	58.3	-2.6	-9.9	14.3	-3.7	81	53.1	12.3	-6	20	-16	-32	-7		6	-15.6
7.2	47.2	79.9	61.4	25.1	62.4	0.6	-10.5	16.3	-3.3	79.6	51.3	12.1	-7	20	-18	-33	-6		7	-1
7.6	48	80.3	57.5	23.5	63.7	1.5	-8.9	18.7	-1.9	79.6	55.2	14.1	-7.2	19.7	-19.8	-33.8	-3.4		10	-16.3
8	47.6		54.8	23.6	66.5	2.6	-3.6	17.3	-1.2	81.1	66.1	17.6	-10.6	20.4	-19.6	-35.7	-17.1		2.9	-17.9
8.4	45.8		53.9	21.7	71.5	4.2	1.7	19.1	-1.8	79	67.3	17.2	-9.7	19.9	-21.9	-37.2	-20.7		5.6	-18.4
8.8	46.5		52.5	21.1	76.1	4.2	7.1	15.5	-1.1	80.5	80.6	20.8	-15.5	21.4	-22.3	-38.2	-20.9		7	-20.2
9.2			51.7			3.4	7.6	11.9	-4.3	78.3	84.1	23.4	-14.9	21.6	-24.1	-38.5			5.6	-20
9.6			51.1			3.1	8.9	11.9	-0.5		79.6	27.2	-17.3	17.6	-23.8	-41.7				-20.4
10			54			3.9	12.1	15.2	27.3		81.6	32.9	-20.9	16.9	-24	-42.3				-19.5
10.4			51.2						38.4		82.8	34	-22.3	16.1	-25.3	-46				-16.1
10.9			50.5						39.4		84.7		-22	12.9	-23.5	-47.1				-13.5
11.3			49.6						42.7		85.4		-22.1	11.7	-24.1	-49				-11
11.7			51.2						48.2		85		-25	12.3	-22.9	-50.4				-16.3
12.1			50.8								83.8		1	12.7	-25.2	-49.8				-6.6
12.5			52.3								82.2		2	12.6	-21.4	-50				-4.6
12.9			52								82.9		-22	12.7	-22	-51				-5
13.3			52.5								80.2		-22	12.6	-21	-40				7
