# Supplementary material for: Proper migration of lymphatic endothelial cells requires survival and guidance cues from arterial mural cells
Source: eLife. 2022 Mar 22;11:e74094. doi: 10.7554/eLife.74094 (PMC9042226; doi:10.7554/eLife.74094)
Supplement: Figure 4—source data 5. [file elife-74094-fig4-data5.xlsx]

## Sheet: Sheet1
Figure 4 - Source Data 5
Figure 4J: LEC cell number before and after migration from 4H
Summary Statistics (arithmetic from GraphPad Prism 9)
	57 hpf		72 hpf
	DMSO	SL327	DMSO	SL327
Total n	10	9	10	9
Mean	12.2	13.11	14	5.889
SD	1.814	2.028	2.667	2.977
SEM	0.5735	0.6759	0.8433	0.9923
Tukey's multiple comparisons test	Mean Diff,	95,00% CI of diff,	Summary	Adjusted P Value		* p values determined using one-way ANOVA with Tukey post hoc test
57 hpf DMSO vs. 57 hpf SL327	-0.9111	-3,901 to 2,079	ns	0.8432
57 hpf DMSO vs. 72 hpf DMSO	-1.8	-4,710 to 1,110	ns	0.3545
57 hpf DMSO vs. 72 hpf SL327	6.311	3,321 to 9,301	****	<0,0001
57 hpf SL327 vs. 72 hpf DMSO	-0.8889	-3,879 to 2,101	ns	0.8526
57 hpf SL327 vs. 57 hpf SL327	7.222	4,155 to 10,29	****	<0,0001
72 hpf DMSO vs. 72 hpf SL327	8.111	5,121 to 11,10	****	<0,0001
Source Data
	DMSO				SL327
Embryos	57 hpf	72 hpf		Embryos	57 hpf	72 hpf
1	13	15		1	4	12
2	13	20		2	0	9
3	9	11		3	8	14
4	13	14		4	7	15
5	12	11		5	8	12
6	15	14		6	9	15
7	12	13		7	6	12
8	11	14		8	8	14
9	10	12		9	3	15
10	14	16
