# Supplementary material for: Proper migration of lymphatic endothelial cells requires survival and guidance cues from arterial mural cells
Source: eLife. 2022 Mar 22;11:e74094. doi: 10.7554/eLife.74094 (PMC9042226; doi:10.7554/eLife.74094)
Supplement: Figure 4—source data 6. [file elife-74094-fig4-data6.xlsx]

## Sheet: Sheet1
Figure 4 - Source Data 6
Figure 4K: LEC cell proliferation quantified from 4H
Summary Statistics (arithmetic from GraphPad Prism 9)
	DMSO	SL327 15µM
Total n	10	13
Mean	0.2469	0.01538
SD	0.0778	0.05547
SEM	0.0246	0.01538
P value		<0,0001
P value summary		****	*p values determined using Mann Whitney test
Shapiro-Wilk test	DMSO	SL327 15µM
W	0.9385	0.311
P value	0.5363	<0,0001
Passed normality test (alpha=0.05)?	Yes	No
P value summary	ns	****
Source Data
Embryos	LEC Proliferation/per nuclei	total	Ratio
DMSO-1	1	5	0.2
DMSO-2	1	6	0.166667
DMSO-2	1	5	0.2
DMSO-3	3	8	0.375
DMSO-4	2	9	0.222222
DMSO-5	2	8	0.25
DMSO-6	2	6	0.333333
DMSO-7	0	4
DMSO-8	2	8	0.25
DMSO-9	2	6	0.333333
SL327-1	0	3	0
SL327-2	0	2	0
SL327-3	0	4	0
SL327-4	0	3	0
SL327-5	1	5	0.2
SL327-6	0	6	0
SL327-7	0	2	0
SL327-8	0	5	0
SL327-9	0	3	0
SL327-10	0	3	0
SL327-11	0	4	0
SL327-12	0	2	0
SL327-13	0	7	0
