# Supplementary material for: Proper migration of lymphatic endothelial cells requires survival and guidance cues from arterial mural cells
Source: eLife. 2022 Mar 22;11:e74094. doi: 10.7554/eLife.74094 (PMC9042226; doi:10.7554/eLife.74094)
Supplement: Figure 4—source data 7. [file elife-74094-fig4-data7.xlsx]

## Sheet: Sheet1
Figure 4 - Source Data 7
Figure4—figure supplement 2C: Positive signal in TUNEL staining
Source Data
number of positive TUNEL signal
	DMSO				SL327
Embryos	PCV	LEC		Embryos	PCV	LEC
1	0	0		1	0	1
2	0	0		2	0	1
3	0	0		3	0	1
4	0	0		4	0	0
5	0	0		5	0	0
6	0	0		6	0	0
7	0	0		7	0	1
8	0	0		8	0	0
9	0	0		9	0	0
10	0	0		10	0	0
11	0	0		11	0	0
12	0	0		12	0	0
13	0	0		13	0	0
14	0	0		14	0	1
15	0	0		15	0	0
16	0	0		16	0	0
17	0	0		17	0	0
18	0	0		18	0	0
19	0	0		19	0	0
20	0	0		20	0	0
21	0	0		21	0	0
22	0	0		22	0	1
23	0	0		23	0	1
24	0	0		24	0	0
25	0	0		25	0	0
26	0	0		26	0	0
27	0	0		27	0	0
28	0	0		28	0	0
29	0	0		29	0	0
30	0	0		30	0	0
31	0	0		31	0	0
32	0	0		32	0	0
33	0	0		33	0	0
34	0	0		34	0	0
35	0	0		35	0	0
36	0	0		36	0	0
37	0	0		37	0	0
38	0	0		38	0	0
39	0	0		39	0	0
40	0	0		40	0	0
41	0	0		41	0	0
				42	0	0
				43	0	0
				44	0	0
				45	0	0
