# Supplementary material for: Proper migration of lymphatic endothelial cells requires survival and guidance cues from arterial mural cells
Source: eLife. 2022 Mar 22;11:e74094. doi: 10.7554/eLife.74094 (PMC9042226; doi:10.7554/eLife.74094)
Supplement: Figure 5—source data 1. [file elife-74094-fig5-data1.xlsx]

## Sheet: Sheet1
Figure 5 - Source Data 1
Figure 5C: Migrating distance quantified from 5B
Summary Statistics (arithmetic from GraphPad Prism 9)
	widetype + hs				sflt4+ - hs				sflt4+ + hs				sflt4+ + AMD
time (h)	Mean	SD	SEM	N	Mean	SD	SEM	N	Mean	SD	SEM	N	Mean	SD	SEM	N
0	0	0	0	10	0	0	0	6	0	0	0	8	0	0	0	11
0.6	9.16767	7.91694	2.50356	10	8.84833	6.19872	2.53062	6	0.4125	1.82321	0.644603	8	-3.40182	8.59633	2.59189	11
1.2	12.5374	8.78517	2.77811	10	9.975	5.04741	2.0606	6	1.67625	3.06244	1.08273	8	-4.01	11.7499	3.54274	11
1.8	15.7018	9.88708	3.12657	10	13.5067	3.89337	1.58946	6	2.5	4.34511	1.53623	8	-5.58636	14.1347	4.26177	11
2.4	19.7365	10.3018	3.25772	10	15.455	5.02337	2.05078	6	2.7875	4.42087	1.56301	8	-11.2882	17.1409	5.16817	11
3	22.6261	10.9707	3.46923	10	18.8	5.41322	2.20994	6	-2.475	8.94647	3.16305	8	-12.5909	18.8147	5.67286	11
3.6	25.2772	13.1728	4.1656	10	19.4167	5.43122	2.21729	6	-3.9375	4.83822	1.71057	8	-14.2627	20.5895	6.20797	11
4.2	27.4347	14.6627	4.63675	10	17.5583	7.12794	2.90997	6	-4.1625	6.11601	2.16233	8	-16.8364	21.0155	6.3364	11
4.8	28.7849	16.3775	5.17902	10	17.4083	8.8543	3.61475	6	-5.4375	8.76616	3.09931	8	-18.8982	20.6443	6.22449	11
5.4	29.4882	16.2683	5.1445	10	18.0967	8.45717	3.45262	6	-8	10.4298	3.68748	8	-23.7673	19.699	5.93947	11
6	29.7566	17.8852	5.6558	10	19.54	10.0175	4.08961	6	-9.65	12.271	4.33845	8	-24.65	19.9681	6.0206	11
6.6	30.3172	18.6379	5.89383	10	20.7283	9.74567	3.97865	6	-10.7125	13.1739	4.65769	8	-25.9845	20.3865	6.14676	11
7.2	33.0052	19.5209	6.17305	10	22.0567	11.6185	4.74322	6	-10.5488	13.7817	4.87255	8	-28.1745	18.8332	5.67843	11
7.8	35.3925	19.3199	6.1095	10	22.9633	11.4878	4.68988	6	-10.3488	13.4815	4.76645	8	-28.7873	17.906	5.39887	11
8.4	38.1451	19.4742	6.15829	10	27.6883	14.7285	6.01288	6	-9.65	12.8339	4.53746	8	-30.994	20.3666	6.4405	10
9	41.0221	22.0969	6.98765	10	30.055	15.1751	6.19522	6	-9.5125	13.3307	4.71311	8	-31.006	20.811	6.581	10
9.6	44.8319	25.613	8.09955	10	32.165	17.7801	7.2587	6	-8.7125	12.7464	4.50652	8	-33.558	19.8568	6.27926	10
10.2	48.6215	26.3105	8.3201	10	32.6767	16.7617	6.84295	6	-9.1	12.2351	4.32575	8	-33.4156	21.3803	7.12677	9
10.8	52.402	27.5002	8.69634	10	35.7867	17.3442	7.08073	6	-8.85	11.4004	4.03064	8	-35.2925	21.3158	7.53628	8
11.4	54.5186	28.7127	9.07977	10	36.1383	16.9597	6.92376	6	-9.75	12.0282	4.2526	8	-32.062	19.8451	8.87499	5
12	67.4482	30.4474	12.4301	6	42.44	13.5028	5.51248	6	-7.35714	9.52818	3.60131	7	-34.184	18.6433	8.33756	5
Tukey's multiple comparisons test	Mean Diff,	95,00% CI of diff,	Summary	Adjusted P Value
widetype + hs vs. sflt4+ - hs	9.758	-0,1177 to 19,63	ns	0.0544				* p values determined using one-way ANOVA with Tukey post hoc test
widetype + hs vs. sflt4+ + hs	37.48	27,60 to 47,35	****	<0,0001
widetype + hs vs. sflt4+ + AMD	53.09	43,22 to 62,97	****	<0,0001
sflt4+ - hs + hs vs. sflt4+ + hs	27.72	17,85 to 37,60	****	<0,0001
sflt4+ - hs + hs vs. sflt4+ + AMD	43.34	33,46 to 53,21	****	<0,0001
sflt4+ + hs + hs vs. sflt4+ + AMD	15.62	5,740 to 25,49	***	0.0003
Source Data
	time (h)	widetype + hs	n embryo=7									time (h)	sflt4+ - hs	n embryo=5					time (h)	sflt4+ + hs	n embryo=5							time (h)	sflt4+ + AMD	n embryo=6
	0	0	0	0	0	0	0	0	0	0	0	0	0	0	0	0	0	0	0	0	0	0	0	0	0	0	0	0	0	0	0	0	0	0	0	0	0	0	0
	0.6	5.11672	5.39	9.63	7.99	4.9	4.22	3.99	3.21	25.78	21.45	0.6	2.59	13.14	19.23	6.27	4.69	7.17	0.6	2.2	2.9	-0.1	-1.8	1.6	-0.6	1.1	-2	0.6	1	-4.7	-17.2	-1.7	1.8	3.2	6.1	-5.1	0.4	0.4	-21.62
	1.2	2.6844	6.78	17.45	8.45	7.1	7.11	19.4	5.49	29.58	21.33	1.2	4.63	16.36	14.57	11.31	4.16	8.82	1.2	3.6	4.3	2.1	-1.59	4.7	0.5	3.6	-3.8	1.2	6.59	-11	-24.1	-1.8	4.59	6.1	6.8	-4.91	-2.6	2.09	-25.87
	1.8	3.09845	12.3	16.23	11.14	7.3	11.54	24.46	10.65	36.5	23.8	1.8	10.84	16.59	18.81	14.5	8.21	12.09	1.8	2.1	4.4	2.5	-1	9.2	1.1	6.5	-4.8	1.8	9.3	-13.5	-25.3	-2.91	3.4	6.3	5.3	-4	-2.8	-0.91	-36.33
	2.4	9.94465	20.22	17.03	15.29	4.2	14.51	29.67	17.95	38.67	29.88	2.4	15.01	18.13	22.21	17.3	7.68	12.4	2.4	7.3	5.5	4.5	-0.8	4.9	1.4	5.6	-6.1	2.4	3.2	-16	-39	-7.3	3.3	6.7	1.6	-0.41	-10	-24.6	-41.66
	3	14.1212	25.07	15.68	16.97	6.4	17.12	33.38	23.39	44.06	30.07	3	19.78	21.96	26.17	19.82	11.61	13.46	3	-0.8	-1.1	3.5	0.7	3.8	3.4	-23	-6.3	3	4.2	-13.1	-43.7	-9.91	0.7	6	-4.6	0.2	-25.1	-4.41	-48.78
	3.6	16.5222	26.43	18.96	14.63	1.1	26.16	36.64	30.87	48.05	33.41	3.6	19.02	20	28.1	21.92	13.16	14.3	3.6	-9	-1.7	2.3	-2.5	-1.8	0	-11.9	-6.9	3.6	13.7	-20.5	-47.6	-10	-3.5	7.2	-7.8	-0.3	-29.3	-9.5	-49.29
	4.2	20.4167	32.56	16.65	15.46	-1.2	29.43	35.94	39.43	49.37	36.29	4.2	10.06	17.96	27.47	24.19	15.16	10.51	4.2	-17.5	-0.2	0.6	-1.5	-6	0.1	-1.5	-7.3	4.2	9.7	-22.2	-49.7	-11	-5.91	3.3	-10.2	-0.41	-32.7	-11.2	-54.88
	4.8	26.809	39.34	17.52	16.34	-4.1	27.79	29.81	35.53	53.74	45.07	4.8	3.36	20.04	24.38	27.05	18.85	10.77	4.8	-25.2	-1.7	0.4	0.5	-6.1	1.9	-4.8	-8.5	4.8	11.3	-21.6	-54.3	-11.7	-14.8	2.4	-10.9	-11.5	-31.1	-11.5	-54.18
	5.4	28.9519	40.45	18.32	18.31	-3.7	26.05	29.61	38.43	53.65	44.81	5.4	3.46	18.52	25.23	26.27	21.08	14.02	5.4	-30.8	-2.5	0.3	-0.3	-4.6	-2.5	-14.3	-9.3	5.4	6.5	-19.7	-59.2	-13	-17.3	-23.9	-9.1	-23	-33.1	-12.6	-57.04
	6	30.986	44.19	19.94	20.65	-9.6	26.39	26.9	41.38	55.21	41.52	6	2.27	19.53	27.56	24.17	29.17	14.54	6	-33.5	-1.4	0.6	-0.7	-4.7	-1.5	-18.9	-17.1	6	7.2	-18.3	-62	-15.8	-18.5	-21.5	-9.9	-26.6	-33.2	-15.7	-56.85
	6.6	32.2719	44.92	17.57	21.9	-8.8	25.16	24.08	46.29	55.32	44.46	6.6	6.03	20.36	27.66	25.31	32.08	12.93	6.6	-37.1	-1.1	0.2	-0.9	-5.5	-3.6	-19.4	-18.3	6.6	4	-17.2	-66.9	-15.7	-16	-21.7	-12.6	-30.41	-33.41	-18.7	-57.21
	7.2	38.0723	50.22	21.7	21	-8.6	33.1	22.66	50.77	56.28	44.85	7.2	3.73	21.48	28.02	30.95	34.47	13.69	7.2	-35.7	-0.3	2.5	1.41	-6.8	-3.7	-22.2	-19.6	7.2	-4.6	-20.6	-65.7	-14.3	-15.5	-23.7	-19	-34.6	-33.3	-19.91	-58.71
	7.8	38.9847	56.75	24.17	22.13	-2.7	32.61	23.08	54.07	57.4	47.43	7.8	6.93	22.52	33.7	26.96	35.45	12.22	7.8	-34.7	-2.7	3.6	1.91	-7.3	-2.6	-20	-21	7.8	-6	-20.6	-63.8	-14.1	-17.2	-27.5	-21.4	-33.7	-32.5	-21.2	-58.66
	8.4	39.4711	57.58	23.7	24.85	8.9	27.33	22.68	67.87	57.37	51.7	8.4	7.59	32.51	39.18	32.55	42.98	11.32	8.4	-30.7	-1.6	5.4	2.3	-8	-3.6	-19.8	-21.2	8.4	-6.6	-21.1	-67.7	-15.8	-17.8	-27.2		-35.2	-33.7	-20.2	-64.64
	9	41.5311	55.79	28.53	24.14	9.1	20.11	30.09	76.05	65.16	59.72	9	12.02	39.05	47.32	30.36	40.12	11.46	9	-30.3	-1.3	6	3.6	-10.5	-1.5	-21.5	-20.6	9	-3.5	-22.8	-65.3	-15.7	-17.2	-32.5		-35.3	-32	-18.7	-67.06
	9.6	41.2194	59.89	30.56	26.68	8.8	21.34	32.91	86.84	77.23	62.85	9.6	8.98	42.98	47.56	32.5	48.97	12	9.6	-25.5	-2.9	6.3	5.6	-8.5	-1.5	-23.5	-19.7	9.6	-9.8	-24.9	-68.5	-32.3	-15.8	-32.8		-32.8	-33.1	-18.3	-67.28
	10.2	48.9951	61.36	36.76	27.05	11.4	24.16	36.94	93.11	81.94	64.5	10.2	9.78	47.06	46.57	32	45.64	15.01	10.2	-26.6	-1.9	1.2	5.6	-7.1	-1.3	-22.5	-20.2	10.2	-6.2	-28.3	-66	-30.5	-14.6	-34.8			-33.91	-18	-68.43
	10.8	53.4403	64.09	40.98	33.43	11.8	22.93	44.18	96.42	90.76	65.99	10.8	12.2	52.38	51.82	32.62	46.78	18.92	10.8	-24.9	-2.4	-1.2	4.5	-4.6	-0.7	-22.5	-19	10.8	-16.5	-29.5	-62.8	-32.7	-16.1	-35.4				-17.41	-71.93
	11.4	51.7656	63.42	37.4	37.1	18	24.96	43.85	99.4	101.76	67.53	11.4	11.91	53.86	54.8	35.48	38.21	22.57	11.4	-30.7	-1.9	-3	3.7	-7.4	0	-20	-18.7	11.4	-24.1	-37.3	-64.4		-16.91					-17.6
	12	55.6693					29.86	48.69	99.61	108.35	62.51	12	18.84	54.66	52.25	37.5	40.06	51.33	12		-0.9	-3.3	-0.7	-7.2	1.9	-21.9	-19.4	12	-25.41	-39.2	-64.4		-17.41					-24.5
