# Supplementary material for: Proper migration of lymphatic endothelial cells requires survival and guidance cues from arterial mural cells
Source: eLife. 2022 Mar 22;11:e74094. doi: 10.7554/eLife.74094 (PMC9042226; doi:10.7554/eLife.74094)
Supplement: Figure 5—source data 2. [file elife-74094-fig5-data2.xlsx]

## Sheet: Sheet1
Figure 5 - Source Data 2
Figure 5D: Migrating velocity quantified from 5B
Summary Statistics (arithmetic from GraphPad Prism 9)
	widetype + hs	sflt4+ - hs	sflt4+ + hs	sflt4+ + AMD
Total n	10	6	8	9
Mean	4.526	2.689	-1.735	-3.809
SD	2.609	0.8529	1.183	1.773
SEM	0.825	0.3482	0.4183	0.5911
Tukey's multiple comparisons test	Mean Diff,	95,00% CI of diff,	Summary	Adjusted P Value		* p values determined using one-way ANOVA with Tukey post hoc test
widetype + hs vs. sflt4+ - hs	1.836	-0,7746 to 4,447	ns	0.2436
widetype + hs vs. sflt4+ + hs	6.26	3,862 to 8,658	****	<0,0001
widetype + hs vs. sflt4+ + AMD	8.334	6,011 to 10,66	****	<0,0001
sflt4+ - hs vs. sflt4+ + hs	4.424	1,694 to 7,155	***	0.0007
sflt4+ - hs vs. sflt4+ + AMD	6.498	3,834 to 9,163	****	<0,0001
sflt4+ + hs vs. sflt4+ + AMD	2.074	-0,3827 to 4,530	ns	0.1214
Source Data
	Velocity of migrtaion (µm/h)
	widetype + hs	sflt4+ - hs	sflt4+ + hs	sflt4+ + AMD
	n embryo=7	n embryo=5	n embryo=5	n embryo=6
	4.54751	1.68795	-3.60969	-1.20856
	6.01792	3.66905	0.169393	-2.76612
	2.78926	2.20143	-1.84458	-3.96822
	3.11403	3.75749	-2.63143	-3.35712
	1.57612	2.1459	-1.83413	-2.92794
	3.52223	2.67518	-0.514541	-5.91895
	2.04212		-2.21494	-4.72629
	8.09724		-1.398	-2.5326
	9.53822			-6.87121
	4.01078
