# Supplementary material for: Proper migration of lymphatic endothelial cells requires survival and guidance cues from arterial mural cells
Source: eLife. 2022 Mar 22;11:e74094. doi: 10.7554/eLife.74094 (PMC9042226; doi:10.7554/eLife.74094)
Supplement: Figure 5—source data 3. [file elife-74094-fig5-data3.xlsx]

## Sheet: Sheet1
Figure 5 - Source Data 3
Figure 5F: Quantification of LEC number in 5E
Summary Statistics (arithmetic from GraphPad Prism 9)
	wildtype + hs	sflt4+ - hs	wildtype + AMD	sflt4+ + hs	sflt4+ + AMD
Total n	20	19	14	16	19
Mean	1.8	1.632	1.714	1.125	1.158
SD	0.7678	0.8951	0.8254	0.8851	0.9582
SEM	0.1717	0.2053	0.2206	0.2213	0.2198
Kruskal-Wallis test
P value	0.0712
Exact or approximate P value?	Approximate
P value summary	ns
Do the medians vary signif. (P < 0.05)?	No
Source Data
	Embryo	wildtype + hs		Embryo	sflt4+ - hs		Embryo	wildtype + AMD		Embryo	sflt4+ + hs		Embryo	sflt4+ + AMD
	1	0		1	1		1	1		1	3		1	0
	2	2		2	1		2	1		2	0		2	0
	3	3		3	3		3	3		3	1		3	0
	4	2		4	2		4	2		4	2		4	3
	5	2		5	1		5	2		5	2		5	2
	6	1		6	2		6	3		6	1		6	2
	7	2		7	0		7	2		7	1		7	1
	8	2		8	3		8	2		8	2		8	2
	9	3		9	1		9	0		9	0		9	2
	10	1		10	2		10	2		10	1		10	2
	11	1		11	2		11	2		11	0		11	0
	12	2		12	1		12	1		12	0		12	1
	13	1		13	1		13	1		13	1		13	0
	14	1		14	1		14	2		14	1		14	2
	15	2		15	2					15	2		15	2
	16	3		16	1					16	1		16	1
	17	2		17	1								17	1
	18	2		18	3								18	1
	19	2		19	3								19	0
	20	2
