# Supplementary material for: Proper migration of lymphatic endothelial cells requires survival and guidance cues from arterial mural cells
Source: eLife. 2022 Mar 22;11:e74094. doi: 10.7554/eLife.74094 (PMC9042226; doi:10.7554/eLife.74094)
Supplement: Figure 5—source data 4. [file elife-74094-fig5-data4.xlsx]

## Sheet: Sheet1
Figure 5 - Source Data 4
Figure 5G: Ratio of pERK+ LEC quantified from 5E
Summary Statistics (arithmetic from GraphPad Prism 9)
	widetype + hs	sflt4+ - hs	sflt4- + AMD	sflt4+ + hs	sflt4+ + AMD
Total n	20	19	14	16	19
Mean	90.83	71.05	77.38	27.08	28.07
SD	19.1	42.25	36.75	44.25	41.59
SEM	4.271	9.693	9.822	11.06	9.542
Dunn's multiple comparisons test	Mean rank diff,	Significant?	Summary	Adjusted P Value		* p values determined using one-way ANOVA with Dunn's post hoc test
wildtype + hs vs. sflt4+ - hs	9.621	No	ns	>0,9999
wildtype + hs vs. sflt4+ + hs	31.45	Yes	***	0.0006
wildtype + hs vs. sflt4+ + AMD	31.41	Yes	***	0.0003
wild type + hs vs. wildtype + AMD	7.057	No	ns	>0,9999
sflt4+ - hs vs. sflt4+ + hs	21.83	No	ns	0.0571
sflt4+ - hs vs. sflt4+ + AMD	21.79	Yes	*	0.0391
sflt4+ - hs vs. wildtype + AMD	-2.564	No	ns	>0,9999
sflt4+ + hs vs. sflt4+ + AMD	-0.03947	No	ns	>0,9999
sflt4+ + hs vs. wild type + AMD	-24.39	Yes	*	0.0419
sflt4+ + hs vs. sflt4+ + AMD	-24.35	Yes	*	0.0297
Source Data
	wildtype + hs (n embryo=20)			sflt4+ - hs (n embryo=19)			wildtype + AMD (n embryo=14)			sflt4+ + hs (n embryo=16)			sflt4+ + AMD (n embryo=19)
	pErk+	total ISLV	Ratio	pErk+	total ISLV	Ratio	pErk+	total ISLV	Ratio	pErk+	total ISLV	Ratio	pErk+	total ISLV	Ratio
	2	2	100	1	1	100	1	1	100	1	3	33.3333	0	0	0
	2	3	50	1	1	100	1	1	100	0	0	0	0	0	0
	4	4	100	3	3	100	2	3	66.6667	1	1	100	0	0	0
	4	4	100	2	2	100	2	2	100	0	2	0	1	3	33.3333
	4	4	100	1	1	100	2	2	100	0	2	0	1	2	50
	1	2	100	2	2	100	2	3	66.6667	0	1	0	2	2	100
	4	4	100	0	0	0	2	2	100	0	1	0	0	1	0
	2	2	50	1	3	33.3333	2	2	100	0	2	0	2	2	0
	2	3	66.6667	1	1	100	0	0	0	0	0	0	2	2	100
	2	2	100	1	2	50	2	2	100	1	1	100	1	2	0
	2	2	100	2	2	100	1	2	50	0	0	0	0	0	0
	2	2	100	1	1	100	1	1	100	0	0	0	0	1	0
	2	2	100	1	1	100	1	1	100	1	1	100	0	0	0
	3	3	100	0	1	0	0	2	0	1	1	100	2	2	100
	3	3	100	2	2	100				0	2	0	1	2	50
	5	5	100	0	1	0				0	1	0	0	1	0
	4	4	100	1	1	100							0	1	0
	3	3	100	0	3	0							1	1	100
	2	3	50	2	3	66.6667							0	0	0
	1	1	100
