# Supplementary material for: Proper migration of lymphatic endothelial cells requires survival and guidance cues from arterial mural cells
Source: eLife. 2022 Mar 22;11:e74094. doi: 10.7554/eLife.74094 (PMC9042226; doi:10.7554/eLife.74094)
Supplement: Figure 5—source data 5. [file elife-74094-fig5-data5.xlsx]

## Sheet: Sheet1
Figure 5 - Source Data 5
Figure5—figure supplement 1B: LEC fates quantified from Figure 5B
Source data
		widetype + hs	sflt4+ - hs	sflt4+ + hs	sflt4+ + AMD
		n embryo=7	n embryo=5	n embryo=5	n embryo=19
	cell deadth	0	0	3	2
	Total cell	10	6	9	8
	ratio death	0	0	66.6667	75
	ratio survival	100	100	33.3333	25
